# Supplementary material for: Machine Learning Prediction Models for Mitral Valve Repairability and Mitral Regurgitation Recurrence in Patients Undergoing Surgical Mitral Valve Repair
Source: MDPI journal article supplement (doi:10.3390/bioengineering8090117), 2021-08-25
Supplement: s1 [file s1]

Supplementary data of:

# Machine Learning Prediction Models for Mitral Valve Repairability and Mitral Regurgitation Recurrence in Patients Undergoing Surgical Mitral Valve Repair

Marco Penso <sup>1,2\*</sup>, Mauro Pepi <sup>1</sup>, Valentina Mantegazza <sup>1</sup>, Claudia Cefalù <sup>1</sup>, Manuela Muratori <sup>1</sup>, Laura Fusini <sup>1,2</sup>, Paola Gripari <sup>1</sup>, Sarah Ghulam Ali <sup>1</sup>, Enrico G. Caiani <sup>2,3</sup> and Gloria Tamborini <sup>1</sup>

<sup>1</sup> Department of Cardiovascular Imaging, Centro Cardiologico Monzino IRCCS, 20138 Milan, Italy; Mauro.Pepi@cardiologicomonzino.it (M.P.); Valentina.Mantegazza@cardiologicomonzino.it (V.M.); Claudia.Cefalu@cardiologicomonzino.it (C.C.); Manuela.Muratori@cardiologicomonzino.it (M.M.); Laura.Fusini@cardiologicomonzino.it (L.F.); Paola.Gripari@cardiologicomonzino.it (P.G.); Sarah.Ghulamali@cardiologicomonzino.it (S.G.A.); Gloria.Tamborini@cardiologicomonzino.it (G.T.)

<sup>2</sup> Department of Electronics, Information and Biomedical Engineering, Politecnico di Milano, 20133 Milan, Italy; enrico.caiani@polimi.it

<sup>3</sup> Consiglio Nazionale Delle Ricerche, Istituto di Elettronica e di Ingegneria dell'Informazione e Delle Telecomunicazioni, 20133 Milan, Italy

\* Correspondence: Marco.Penso@cardiologicomonzino.it; Tel.: +39-392-693-0900

**Table S1** – Hyperparameters for decision tree, random forest, support vector machine, gradient boosting and multilayer perceptron algorithms.

Hyperparameter tuning of the models was conducted by grid search using five-fold cross-validation. The scoring function used was F1-score. The hyper-parameter space searched over are presented below.

| Decision Tree             |                               |
|---------------------------|-------------------------------|
| criterion                 | Gini                          |
| max_depth                 | [3-8]                         |
| min_samples_split         | [2-7]                         |
| min_samples_leaf          | [1-4]                         |
| Random Forest             |                               |
| criterion                 | Gini                          |
| n_estimators              | [50,60,80,100,200,400,500]    |
| max_depth                 | [3-8]                         |
| min_sample_split          | [3-8]                         |
| min_samples_leaf          | [1-4]                         |
| Support Vector Machine    |                               |
| C                         | [0.1, 1,10,100]               |
| kernel                    | ['poly', 'rbf', 'sigmoid']    |
| gamma                     | [1, 0.1, 0.01, 0.001,'auto' ] |
| probability               | True                          |
| Gradient boosting machine |                               |
| learning_rate             | [0.1,0.01]                    |
| n_estimators              | [50,60,80,100,200,400,500]    |
| max_depth                 | [3-8]                         |
| min_child_weight          | [1-4]                         |
| gamma                     | [0, 0.5,1,1.5,2,5]            |
| colsample_bytree          | [0.6,0.8,1]                   |
| Multilayer perceptron     |                               |
| batch size                | [1,2,4,8]                     |
| hidden layer              | [1-3]                         |

|                       |                                                |
|-----------------------|------------------------------------------------|
| learning rate         | [0.1,0.01,0.001]                               |
| dropout rate          | [0.0,0.2,0.3,0.5]                              |
| dense layer units     | [5,10,15]                                      |
| weight initialization | ['uniform', 'zero', 'he_normal', 'he_uniform'] |
| activation function   | Rectified linear unit                          |

**Table S2** – Feature selection. Top ten variables importance in descending order for Random Forest and Gradient Boosting models. Gini importance ranking was used to evaluate the worth of each variable by measuring the total decrease in node impurity averaged over all trees of the ensemble model.

| <b>Dataset 1</b>                           |                                       |
|--------------------------------------------|---------------------------------------|
| Random forest                              | eXtreme Gradient boosted              |
| Age                                        | A2 prolapse                           |
| Body surface area                          | Age                                   |
| Tricuspid valve diameter index             | Tricuspid regurgitation               |
| Left atrial volume index                   | Body surface area                     |
| Left ventricular stroke volume index       | Complex MV prolapse                   |
| Left ventricular ejection fraction         | P2 prolapse                           |
| Systolic pulmonary artery pressure         | Left atrial volume index              |
| Left ventricular end systolic volume index | Systolic pulmonary artery pressure    |
| Left atrial area                           | A1 prolapse                           |
| Medio-lateral mitral annulus diameter      | Tricuspid valve diameter index        |
| <b>Dataset 2</b>                           |                                       |
| Random forest                              | eXtreme Gradient boosted              |
| Mitral regurgitation 6M $\geq 2$           | Mitral regurgitation 6M $\geq 2$      |
| Systolic pulmonary artery pressure         | Systolic pulmonary artery pressure    |
| Age                                        | P2 prolapse                           |
| Tricuspid valve diameter index             | Posteromedial commissure              |
| Left atrial area 6M                        | Age                                   |
| Left atrial volume index 6M                | Left atrial area 6M                   |
| Left ventricular ejection fraction 6M      | Left atrial area                      |
| Left ventricular end systolic volume index | Systolic pulmonary artery pressure 6M |
| Systolic pulmonary artery pressure 6M      | Complex surgical procedure            |
| Left ventricular stroke volume index 6M    | MV prolapse etiology (Barlow)         |

MV, mitral valve; 6M, six months.

```

# Removing Constant Features using Variance Threshold
print('initial columns: %d' % len(x.columns))
constant_filter = VarianceThreshold(threshold=0.01)
constant_filter.fit(x)
constant_columns = [column for column in x.columns
                    if column not in x.columns[constant_filter.get_support()
]]
print('0 variace columns: %d' % len(constant_columns))
for column in constant_columns:
    x = x.drop([column],1)
    print(column)
print(x.shape)

```

```

#Removing Correlated Features using corr() Method
dset = pd.concat([x, y1], axis=1, sort=False)
correlated_features = set()
correlation_matrix = dset.corr()
leng = len(correlation_matrix)
for i in range(len(correlation_matrix .columns)):
    for j in range(i):
        if abs(correlation_matrix.iloc[i, j]) > 0.7:
            print(correlation_matrix.columns[i], '-'
', correlation_matrix.columns[j], '-', abs(correlation_matrix.iloc[i, j]))
            if abs(correlation_matrix.iloc[i, leng-
1]) > abs(correlation_matrix.iloc[j, leng-1]):
                colname = correlation_matrix.columns[j]
                correlated_features.add(colname)
            elif abs(correlation_matrix.iloc[j, leng-
1]) > abs(correlation_matrix.iloc[i, leng-1]):
                colname = correlation_matrix.columns[i]
                correlated_features.add(colname)
            elif abs(correlation_matrix.iloc[i, leng-
1]) == abs(correlation_matrix.iloc[j, leng-1]):
                if correlation_matrix.iloc[i, leng-
1] > correlation_matrix.iloc[j, leng-1]:
                    colname = correlation_matrix.columns[j]
                    correlated_features.add(colname)
            else:
                colname = correlation_matrix.columns[i]
                correlated_features.add(colname)
print(correlated_features)

```

```

#feature selection method

```

```

# apply threshold to positive probabilities to create labels
def to_labels(pos_probs, threshold):
    return (pos_probs >= threshold).astype('int')

```

```

def adjusted_classes(y_scores, th):
    """
    This function adjusts class predictions based on the prediction threshold.
    Will only work for binary classification problems.
    """
    return [1 if y >= th else 0 for y in y_scores]

features = x.columns
scaler = MinMaxScaler()
label_encoder = LabelEncoder()
n_iterations = 100
feature_importance_values_RF = np.zeros(len(features))
feature_importance_values_GB = np.zeros(len(features))

for i in range(n_iterations):
    print('iteration number: %d' % i)
    dtX = dt.drop(['out1'], 1)
    dtY = dt['out1']
    dtX = dtX.values
    dtY = dtY.values
    dtX = scaler.fit_transform(dtX)
    dtY = label_encoder.fit_transform(dtY)

    modelRF = RandomForestClassifier(n_estimators=800, max_depth=7)
    #modelLGB = lgb.LGBMClassifier(objective='binary', n_estimators=1000, learning_rate=0.05, max_depth=5, min_child_samples=2)
    modelXGB = xgb.XGBClassifier(objective="binary:logistic", n_estimators=800, learning_rate=0.01, max_depth=7, colsample_bytree=1)

    fittedRF = modelRF.fit(dtX, dtY)
    fittedGB = modelXGB.fit(dtX, dtY)

    # Record the features importance
    feature_importance_values_RF += fittedRF.feature_importances_ / n_iterations
    feature_importance_values_GB += fittedGB.feature_importances_ / n_iterations

feature_importances = pd.DataFrame({'feature': features, 'importance': feature_importance_values_RF})
# Sort features according to importance
feature_importances = feature_importances.sort_values('importance', ascending=False).reset_index(drop=True)
# Normalize the feature importances
feature_importances['normalized_importance'] = feature_importances['importance'] / feature_importances['importance'].sum()
# Extract the features with zero importance

```

```

record_zero_importance = feature_importances[feature_importances['importance'] == 0.0]
to_drop = list(record_zero_importance['feature'])
# plot features impotances
plot_n = 10
plt.figure(figsize = (10, 8))
ax = plt.subplot()
ax.barh(list(reversed(list(feature_importances.index[:plot_n]))),
          feature_importances['normalized_importance'][:plot_n],
          align = 'center', edgecolor = 'k')
ax.set_yticks(list(reversed(list(feature_importances.index[:plot_n]))))
ax.set_yticklabels(feature_importances['feature'][:plot_n], size = 12)
# Plot labeling
plt.xlabel('Normalized Importance', size = 16); plt.title('Feature Importanc
es RF', size = 18)
plt.show()

```

```

feature_importances = pd.DataFrame({'feature': features, 'importance': featu
re_importance_values_GB})
# Sort features according to importance
feature_importances = feature_importances.sort_values('importance', ascendin
g = False).reset_index(drop = True)
# Normalize the feature importances
feature_importances['normalized_importance'] = feature_importances['importan
ce'] / feature_importances['importance'].sum()
# Extract the features with zero importance
record_zero_importance = feature_importances[feature_importances['importance'] == 0.0]
to_drop = list(record_zero_importance['feature'])
# plot features impotances
plot_n = 10
plt.figure(figsize = (10, 8))
ax = plt.subplot()
ax.barh(list(reversed(list(feature_importances.index[:plot_n]))),
          feature_importances['normalized_importance'][:plot_n],
          align = 'center', edgecolor = 'k')
ax.set_yticks(list(reversed(list(feature_importances.index[:plot_n]))))
ax.set_yticklabels(feature_importances['feature'][:plot_n], size = 12)
# Plot labeling
plt.xlabel('Normalized Importance', size = 16); plt.title('Feature Importanc
es GB', size = 18)
plt.show()

```

```

# apply threshold to positive probabilities to create labels
def to_labels(pos_probs, threshold):
    return (pos_probs >= threshold).astype('int')

```

```

def adjusted_classes(y_scores, t):
    """
    This function adjusts class predictions based on the prediction threshold (t).
    Will only work for binary classification problems.
    """
    return [1 if y >= t else 0 for y in y_scores]

for i in range(n_iterations):
    print ('-----')
    print(i)
    train, test = train_test_split(dset, test_size=0.30, random_state=i, stratify=dset['out1'])

model = xgb.XGBClassifier(objective="binary:logistic")
    param_grid = {'min_child_weight': [1, 2, 3, 4],
                  'gamma': [0.5, 0, 1, 1.5, 2, 5],
                  'colsample_bytree': [0.6, 0.8, 1],
                  'max_depth': [3, 4, 5, 6, 7, 8],
                  'learning_rate': [0.1, 0.01],
                  'n_estimators': [50,60,80,100,200,400,500]}

    skf = StratifiedKFold(n_splits=5,shuffle=True, random_state=0)
    skf.get_n_splits(x_train, y_train)
    gs = GridSearchCV(
        estimator=model,
        param_grid=param_grid,
        cv=skf,
        n_jobs=-1,
        scoring='f1',      #roc_auc  recall  f1
        refit=True
    )
    fitted_model1 = gs.fit(x_train, y_train)
    print('Best parameters: {}'.format(gs.best_params_))
    print('Best score: {}'.format(gs.best_score_))
    fitted_model1 = fitted_model1.best_estimator_
    pred_prob1 = fitted_model1.predict_proba(x_test)
    pred1 = fitted_model1.predict(x_test)
    XGBypred.append(y_test)
    XGBypred_prob.append(pred_prob1[:,1])
    XGBypred.append(pred1)
    # define thresholds
    thresholds = np.arange(0, 1, 0.001)
    # evaluate each threshold
    scores = [f1_score(y_test, to_labels(pred_prob1[:,1], th)) for th in thresholds]
    # get best threshold
    ix = np.argmax(scores)

```

```

XGBthres.append(thresholds[ix])
pred_adj = adjusted_classes(pred_prob1[:,1], thresholds[ix])
# precision
precision = precision_score(y_test, pred_adj)
print('Precision: %.2f' % precision)
XGBcvprecision.append(precision)
# recall
recall = recall_score(y_test, pred_adj)
print('Recall: %.2f' % recall)
XGBcvrecall.append(recall)
# f1
f1 = f1_score(y_test, pred_adj)
print('f1: %.2f' % f1)
XGBcvf1.append(f1)
# accuracy
acc = accuracy_score(y_test, pred_adj)
print('acc: %.2f' % acc)
XGBcvacc.append(acc)
# ROC AUC
auc = roc_auc_score(y_test, pred_prob1[:,1])
print('ROC AUC: %f' % auc)
XGBcvauc.append(auc)
# confusion matrix
matrix = confusion_matrix(y_test, pred_adj)
print(matrix)
TN = matrix[0,0]
FP = matrix[0,1]
FN = matrix[1,0]
TP = matrix[1,1]
XGB_TP.append(TP)
XGB_TN.append(TN)
XGB_FP.append(FP)
XGB_FN.append(FN)
print('FP %d' % FP)
print('FN %d' % FN)
print('TP %d' % TP)
print('TN %d' % TN)
XGB_PPV.append(TP/(TP+FP) )
XGB_NPV.append(TN/(FN+TN) )
XGB_specificity.append(TN/(FP+TN) )
feature_importance_values_XGB += fitted_model1.feature_importances_ / n_
iterations

#plot
feature_importance = feature_importance_values_XGB
feature_names = np.array(features)
#Create a DataFrame using a Dictionary
data={'feature_names':feature_names,'feature_importance':feature_importance}
fi_df = pd.DataFrame(data)
#Sort the DataFrame in order decreasing feature importance

```

```
fi_df.sort_values(by=['feature_importance'], ascending=False,inplace=True)
#Define size of bar plot
plt.figure(figsize=(8,5))
#Plot Searborn bar chart
sns.barplot(x=fi_df['feature_importance'], y=fi_df['feature_names'])
#Add chart labels
plt.title('XGBoost ' + 'FEATURE IMPORTANCE')
plt.xlabel('FEATURE RELATIVE IMPORTANCE')
plt.ylabel('FEATURE NAMES')
```
